# Supplementary material for: Succession in the Gut Microbiome following Antibiotic and Antibody Therapies for Clostridium difficile
Source: PLoS One. 2012 Oct 10;7(10):e46966. doi: 10.1371/journal.pone.0046966 (PMC3468616; doi:10.1371/journal.pone.0046966)
Supplement: Table S1 — Sequences of oligonucleotides used in this study. (XLSX) [file pone.0046966.s001.xlsx]

## Sheet: Sheet1
Table S1
	Name	Sequence	Modifications
16S 454 sequencing	BSF8	5’-AGAGTTTGATCCTGGCTCAG-3’
	BSR357	5’-CTGCTGCCTYCCGTA-3’
18S 454 sequencing	18S-0067a-deg-5'	5’-AAGCCATGCATGYCTAAGTATMA-3’
	Euk_NSR399	5’-TCTCAGGCTCCYTCTCCGG-3’
Cd 16S qPCR	CD16S_102c_3'	5’-GAGCGATTTACTTCGGTAAAGAG-3’
	CD16S_239e_5'	5’-CCTTACCAACTAGCTAATCAGACG-3’
	CD16S_198d_3'	5’-/6-FAM/TCCATCCTGTACTGGCTCACCTTT/BHQ1/-3’	5': 6-fluorescein amidate, 3': Black Hole Quencher 1
